# Supplementary material for: Mass Spectrometry-Based Identification of Bioactive Bee Pollen Proteins: Evaluation of Allergy Risk after Bee Pollen Supplementation
Source: MDPI journal article supplement (doi:10.3390/molecules27227733), 2022-11-10
Supplement: s1 [file s1]

*Supplementary Materials*

# **Mass Spectrometry-Based Identification of Bioactive Bee Pollen Proteins: Evaluation of Allergy Risk After Bee Pollen Supplementation**

Eliza Matuszewska <sup>1,\*</sup>, Szymon Plewa <sup>1</sup>, Dagmara Pietkiewicz <sup>1</sup>, Kacper Kossakowski <sup>1</sup>, Joanna Matysiak <sup>2</sup>, Grzegorz Rosiński <sup>3</sup> and Jan Matysiak <sup>1</sup>

**Table S2.** Results of BLAST analysis including the highest sequence alignments to characterised proteins. [1] - *Vitis vinifera*; [2] - *Arabidopsis lyrata* subsp. *lyrata*; [3] - *Glycine max*; [4] - *Brachypodium distachyon*; [5] - *Arabidopsis thaliana*; [6] - *Brassica rapa*; [7] - *Zea mays*; [8] - *Solanum tuberosum*; [9] - *Vitis riparia*; [10] - *Capsella rubella*; [11] - *Oryza sativa Japonica Group*; [12] - *Glycine soja*; [13] - *Solanum verrucosum*.

| Accession        | Protein Name                               | Significant Alignment Sequence                                                       | Query Coverage | Percent Identity | E-Value               |
|------------------|--------------------------------------------|--------------------------------------------------------------------------------------|----------------|------------------|-----------------------|
| gi 14778089<br>8 | Hypothetical protein VITISV_007504 [1]     | polyprotein [1]                                                                      | 57%            | 79%              | 0.0                   |
| gi 14781560<br>9 | hypothetical protein VITISV_036160 [1]     | PREDICTED: UDP-arabinopyranose mutase 3 [1]                                          | 90%            | 100%             | 0.0                   |
| gi 14782110<br>7 | hypothetical protein VITISV_018473 [1]     | 5-methyltetrahydropteroyltriglutamate--<br>homocysteine<br>methyltransferase [9]     | 100%           | 95%              | 0.0                   |
| gi 29779604<br>9 | hypothetical protein ARALYDRAFT_495305 [2] | actin-depolymerizing factor 12 [10]                                                  | 100%           | 100%             | 2 x 10 <sup>-96</sup> |
| gi 29780493<br>2 | hypothetical protein ARALYDRAFT_915516 [2] | adenosylhomocysteinase 1 [2]                                                         | 100%           | 100%             | 0.0                   |
| gi 29780582<br>2 | hypothetical protein ARALYDRAFT_916391 [2] | UDP-glucose 6-dehydrogenase 4 [2]                                                    | 100%           | 100%             | 0.0                   |
| gi 29781168<br>9 | hypothetical protein ARALYDRAFT_488394 [2] | UDP-glucose 6-dehydrogenase 3 [2]                                                    | 100%           | 100%             | 0.0                   |
| gi 29781213<br>9 | hypothetical protein ARALYDRAFT_488852 [2] | aldehyde oxidase GLOX1 [2]                                                           | 100%           | 100%             | 0.0                   |
| gi 29782002<br>0 | hypothetical protein ARALYDRAFT_906673 [2] | fructose-bisphosphate aldolase 8, cytosolic [2]                                      | 100%           | 100%             | 0.0                   |
| gi 29782712<br>5 | hypothetical protein ARALYDRAFT_482625 [2] | fructose-bisphosphate aldolase 6, cytosolic [2]                                      | 100%           | 100%             | 0.0                   |
| gi 29782923<br>0 | hypothetical protein ARALYDRAFT_478006 [2] | peroxisomal fatty acid beta-oxidation<br>multifunctional protein MFP2 isoform X2 [2] | 100%           | 100%             | 0.0                   |
| gi 29783126<br>4 | hypothetical protein ARALYDRAFT_898993 [2] | late embryogenesis abundant protein 1 [2]                                            | 100%           | 95%              | 2 x 10 <sup>-52</sup> |
| gi 29783283<br>6 | hypothetical protein ARALYDRAFT_896165 [2] | UDP-glucose 6-dehydrogenase 3 [2]                                                    | 100%           | 100%             | 0.0                   |

|                  |                                                        |                                                                         |      |      |                      |
|------------------|--------------------------------------------------------|-------------------------------------------------------------------------|------|------|----------------------|
| gi 29783357<br>4 | hypothetical protein ARALYDRAFT_478121 [2]             | polygalacturonase isoform X1 [2]                                        | 100% | 100% | 0.0                  |
| gi 29783416<br>4 | hypothetical protein ARALYDRAFT_478720 [2]             | L-ascorbate oxidase homolog [2]                                         | 100% | 100% | 0.0                  |
| gi 29783961<br>3 | hypothetical protein ARALYDRAFT_476916 [2]             | protein disulfide isomerase-like 1-2 [2]                                | 97%  | 100% | 0.0                  |
| gi 29784141<br>1 | hypothetical protein ARALYDRAFT_475824 [2]             | aldehyde oxidase GLOX1 [2]                                              | 100% | 97%  | 0.0                  |
| gi 35172069<br>7 | uncharacterized protein LOC100499870 [3]               | NAD(P)H dehydrogenase (quinone) FQR1-like<br>isoform 1 [3]              | 100% | 100% | $1 \times 10^{-133}$ |
| gi 35657448<br>9 | PREDICTED: uncharacterized protein LOC100783153<br>[3] | mediator of DNA damage checkpoint protein 1<br>isoform X2 [3]           | 77%  | 96%  | 0.0                  |
| gi 35711739<br>9 | PREDICTED: uncharacterized protein LOC100827223<br>[4] | hapless 2 isoform X2 [11]                                               | 100% | 64%  | $6 \times 10^{-54}$  |
| gi 36380714<br>0 | uncharacterized protein LOC100795446 [3]               | Fructose-bisphosphate aldolase 6, cytosolic-like [3]                    | 100% | 100% | 0.0                  |
| gi 11683134<br>5 | unknown [5]                                            | pfkB-like carbohydrate kinase family protein [5]                        | 99%  | 100% | 0.0                  |
| gi 11972082<br>2 | unknown [6]                                            | late embryogenesis abundant protein 2 [6]                               | 100% | 100% | $5 \times 10^{-71}$  |
| gi 23801518<br>6 | unknown [7]                                            | glyceraldehyde-3-phosphate<br>dehydrogenase 1, cytosolic isoform X2 [7] | 100% | 100% | 0.0                  |
| gi 25562903<br>1 | unknown [3]                                            | Monodehydroascorbate reductase isoform B [12]                           | 100% | 100% | $3 \times 10^{-120}$ |
| gi 25563873<br>3 | unknown [3]                                            | UDP-glucose 6-dehydrogenase 1 [3]                                       | 100% | 100% | 0.0                  |
| gi 25563899<br>1 | unknown [3]                                            | probable UDP-arabinopyranose mutase 1 [3]                               | 98%  | 100% | 0.0                  |
| gi 77999255      | unknown [8]                                            | fructose-bisphosphate aldolase 6, cytosolic [13]                        | 100% | 100% | 0.0                  |
